# Supplementary material for: The WASP-Arp2/3 complex signal cascade is involved in actin-dependent sperm nuclei migration during double fertilization in tobacco and maize
Source: PubMed Central journal article supplement (PMC5320560; doi:10.1038/srep43161), 2017-02-22
Supplement: srep43161-s1.pdf [file srep43161-s1.pdf]

**The WASP-Arp2/3 complex signal cascade is involved in actin-dependent sperm nuclei migration during double fertilization in tobacco and maize**

Xiongbo Peng<sup>\*</sup>, Tingting Yan, Mengxiang Sun

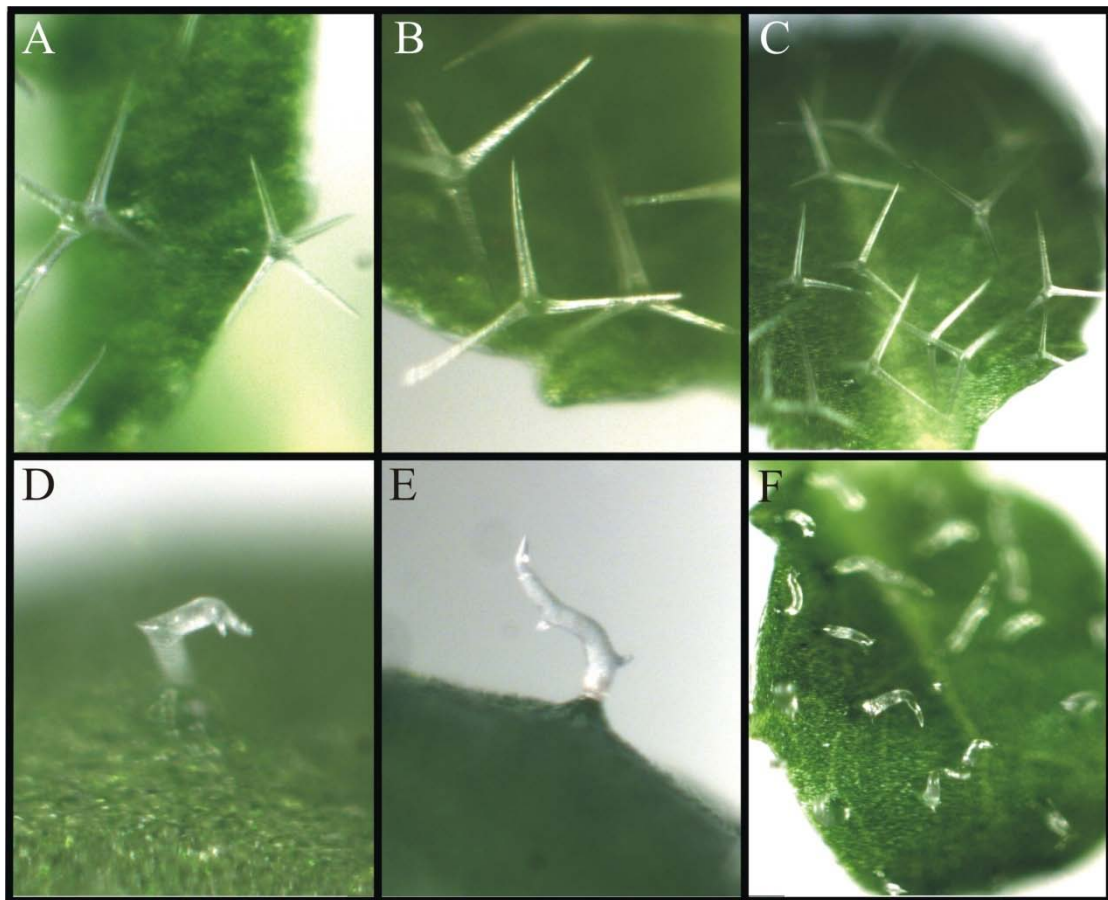

**Supp Fig1** Arp2/3 complex mutant plants show abnormal trichome.  
**A** wide type; **B** *arp2/+* mutant; **C** *arp3/+* mutant;  
**D** *arp2/arp2* mutant; **E** *arp3/arp3* mutant; **F** *arp2arp3double* mutant.

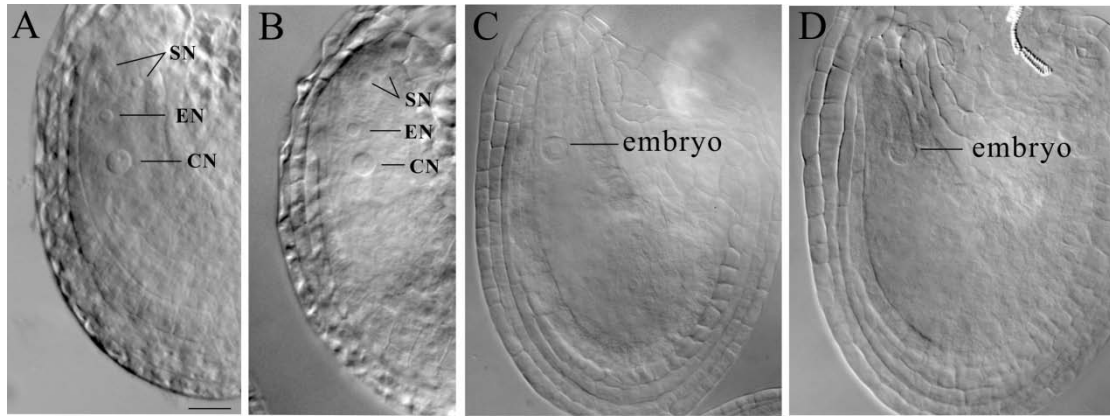

**Supp Fig2** *arp2arp3* double mutant plants show normal female gametophyte and embryo development.

**A** wide type female gametophyte; **B** *arp2arp3* mutant female gametophyte; **C** wide type ovule one day after fertilization; **D** *arp2arp3* mutant ovule one day after fertilization. SN: synergid cell nucleus; EN: egg cell nucleus; CN: central cell nucleus.
